# Supplementary material for: Development and Pharmacokinetics of a Novel Acetylsalicylic Acid Dry Powder for Pulmonary Administration
Source: MDPI journal article supplement (doi:10.3390/pharmaceutics14122819), 2022-12-15
Supplement: s1 [file s1]

**Table S1-** ANOVA statistics and coefficients for the models obtained for the four responses of the 2<sup>6-2</sup> fractional factorial design

| YIELD (%W/W)   |                      |             |         |          | ASA (%W/W)           |             |         |          | FPF (%W/W)           |             |         |          | ED (%W/W)            |             |         |         |
|----------------|----------------------|-------------|---------|----------|----------------------|-------------|---------|----------|----------------------|-------------|---------|----------|----------------------|-------------|---------|---------|
| Factors        | Coefficient estimate | Mean Square | F-value | p-value  | Coefficient estimate | Mean Square | F-value | p-value  | Coefficient estimate | Mean Square | F value | p-value  | Coefficient estimate | Mean Square | F-value | p-value |
| Intercept      | 70.31                | 1359.06     | 46.99   | < 0.0001 | 66.54                | 10050.03    | 362.63  | < 0.0001 | 49.40                | 1419.74     | 40.09   | < 0.0001 | 79.29                | 303.02      | 4.81    | 0.0142  |
| A              | -15.60               | 3892.20     | 134.57  | < 0.0001 | 25.06                | 10050.03    | 362.63  | < 0.0001 | -14.51               | 3368.08     | 95.10   | < 0.0001 | -5.08                | 413.51      | 6.56    | 0.0209  |
| B              | 5.96                 | 568.23      | 19.65   | 0.0005   | -                    | -           | -       | -        | -                    | -           | -       | -        | - 2.69               | 115.43      | 1.83    | 0.1948  |
| D              | -4.14                | 273.65      | 9.46    | 0.0077   | -                    | -           | -       | -        | -2.18                | 75.94       | 2.14    | 0.1625   | -                    | -           | -       | -       |
| AB             | -                    | -           | -       | -        | -                    | -           | -       | -        | -                    | -           | -       | -        | 4.87                 | 380.13      | 6.03    | 0.0259  |
| AD             | -                    | -           | -       | -        | -                    | -           | -       | -        | 7.14                 | 815.19      | 23.02   | 0.0002   | -                    | -           | -       | -       |
| A <sup>2</sup> | -14.81               | 702.17      | 24.28   | 0.0002   | -                    | -           | -       | -        | -                    | -           | -       | -        | -                    | -           | -       | -       |
| Residual       | -                    | 28.92       | -       | -        | -                    | 27.71       | -       | -        | -                    | 35.42       | -       | -        | -                    | 63.04       | -       | -       |
| Lack of fit    | -                    | 20.58       | 0.3304  | 0.9288   | -                    | 28.34       | 1.15    | 0.5201   | -                    | 38.60       | 1.79    | 0.3493   | -                    | 74.56       | 5.69    | 0.0890  |
| Pure error     | -                    | 62.30       | -       | -        | -                    | 24.57       | -       | -        | -                    | 21.62       | -       | -        | -                    | 13.09       | -       | -       |

|  |         |        |                       |         |         |        |                       |        |         |        |                       |         |         |         |                       |        |
|--|---------|--------|-----------------------|---------|---------|--------|-----------------------|--------|---------|--------|-----------------------|---------|---------|---------|-----------------------|--------|
|  | S.D.*   | 5.38   | r <sup>2</sup> *      | 0.9261  | S.D.*   | 5.26   | r <sup>2</sup> *      | 0.9527 | S.D.*   | 5.95   | r <sup>2</sup> *      | 0.8826  | S.D.*   | 7.94    | r <sup>2</sup> *      | 0.4741 |
|  | Mean    | 58.46  | Adj r <sup>2</sup> *  | 0.9064  | Mean    | 66.54  | Adj r <sup>2</sup> *  | 0.9501 | Mean    | 49.40  | Adj r <sup>2</sup> *  | 0.8606  | Mean    | 79.29   | Adj r <sup>2</sup> *  | 0.3754 |
|  | C.V. %* | 9.20   | Pred r <sup>2</sup> * | 0.8686  | C.V. %* | 7.91   | Pred r <sup>2</sup> * | 0.9412 | C.V. %* | 12.05  | Pred r <sup>2</sup> * | 0.8107  | C.V. %* | 10.01   | Pred r <sup>2</sup> * | 0.1407 |
|  | PRESS*  | 771.29 | Adeq Precision*       | 19.1086 | PRESS*  | 620.50 | Adeq Precision*       | 30.109 | PRESS*  | 913.35 | Adeq Precision*       | 16.2665 | PRESS*  | 1647.75 | Adeq Precision*       | 5.6091 |

*\* S.D., standard deviation associated with the experimental error; Mean, dependent mean (average of all the values of the response); C.V.%, coefficient of variance of the model; PRESS, Predicted Residual Sum of Squares for the model; r<sup>2</sup>, multiple correlation coefficient; Adj r<sup>2</sup>, r<sup>2</sup> adjusted for the number of parameters in the model; Pred r<sup>2</sup>, predicted r<sup>2</sup> is a measure of how the model predicts a response value; Adeq Precision, adequate precision a measure of the range in predicted response relative to its associated error.*

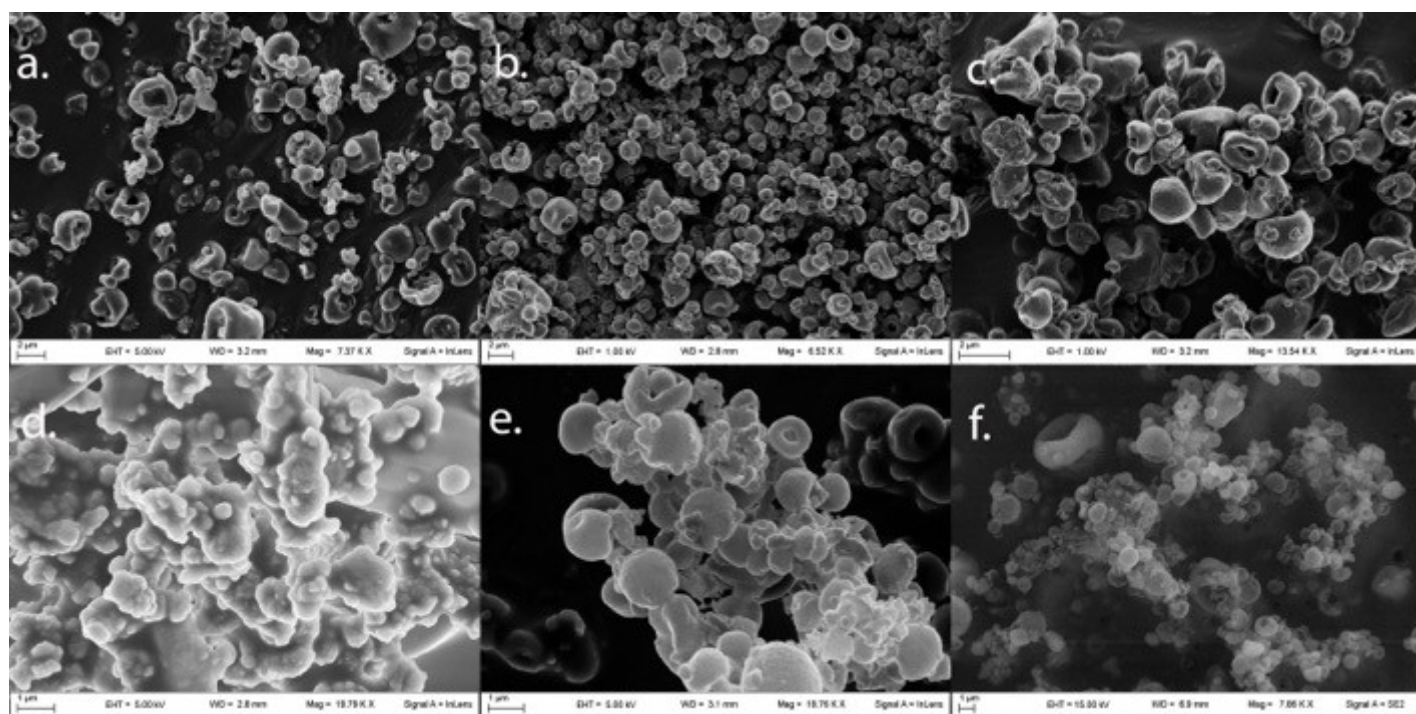

**Figure S1.** Morphology of representative preparations of the 20 runs of the experimental design in Table 2. In detail: a. run# 1, b. run#2, c. run#3, d. run#4, e. run#8, f. run# 10.

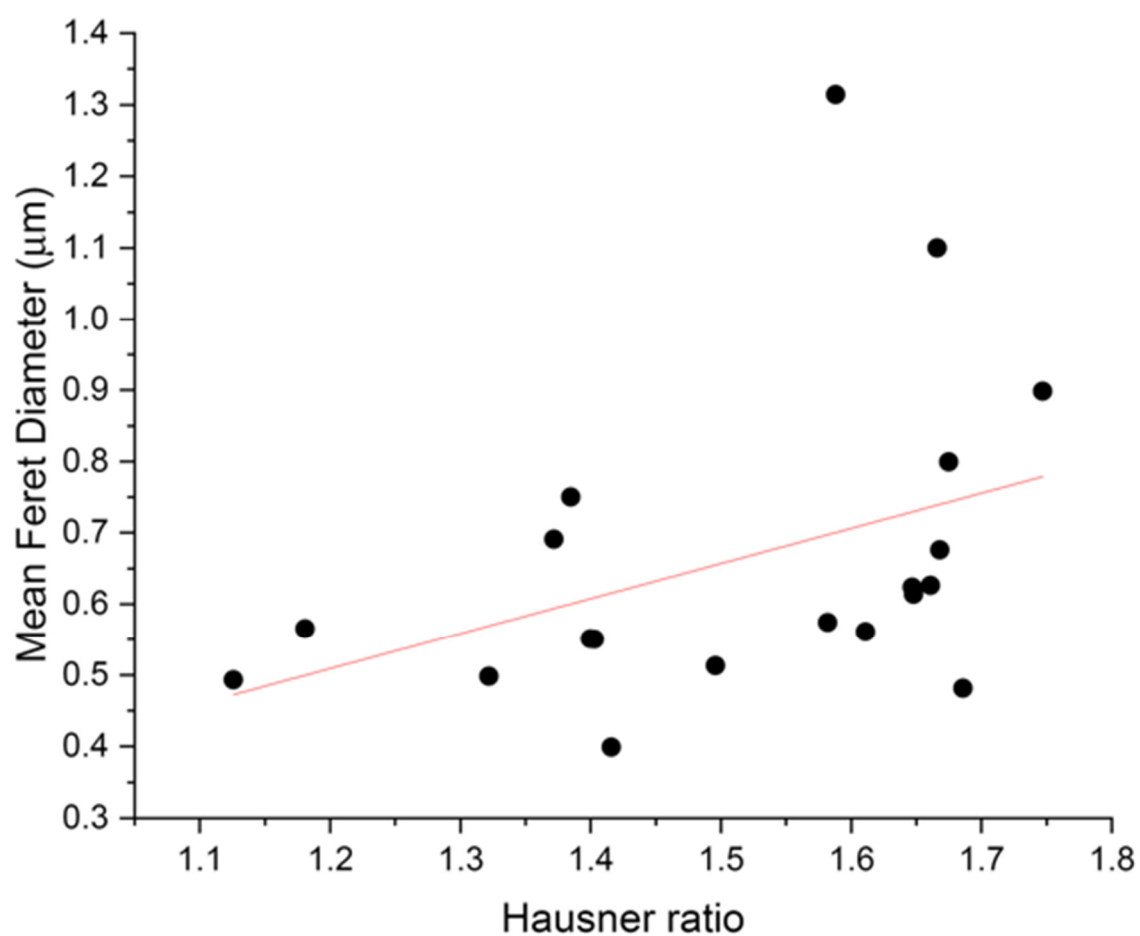

**Figure S2.** Correlation between theoretical flowability and particle size of the 20 runs of the experimental design in Table 2.

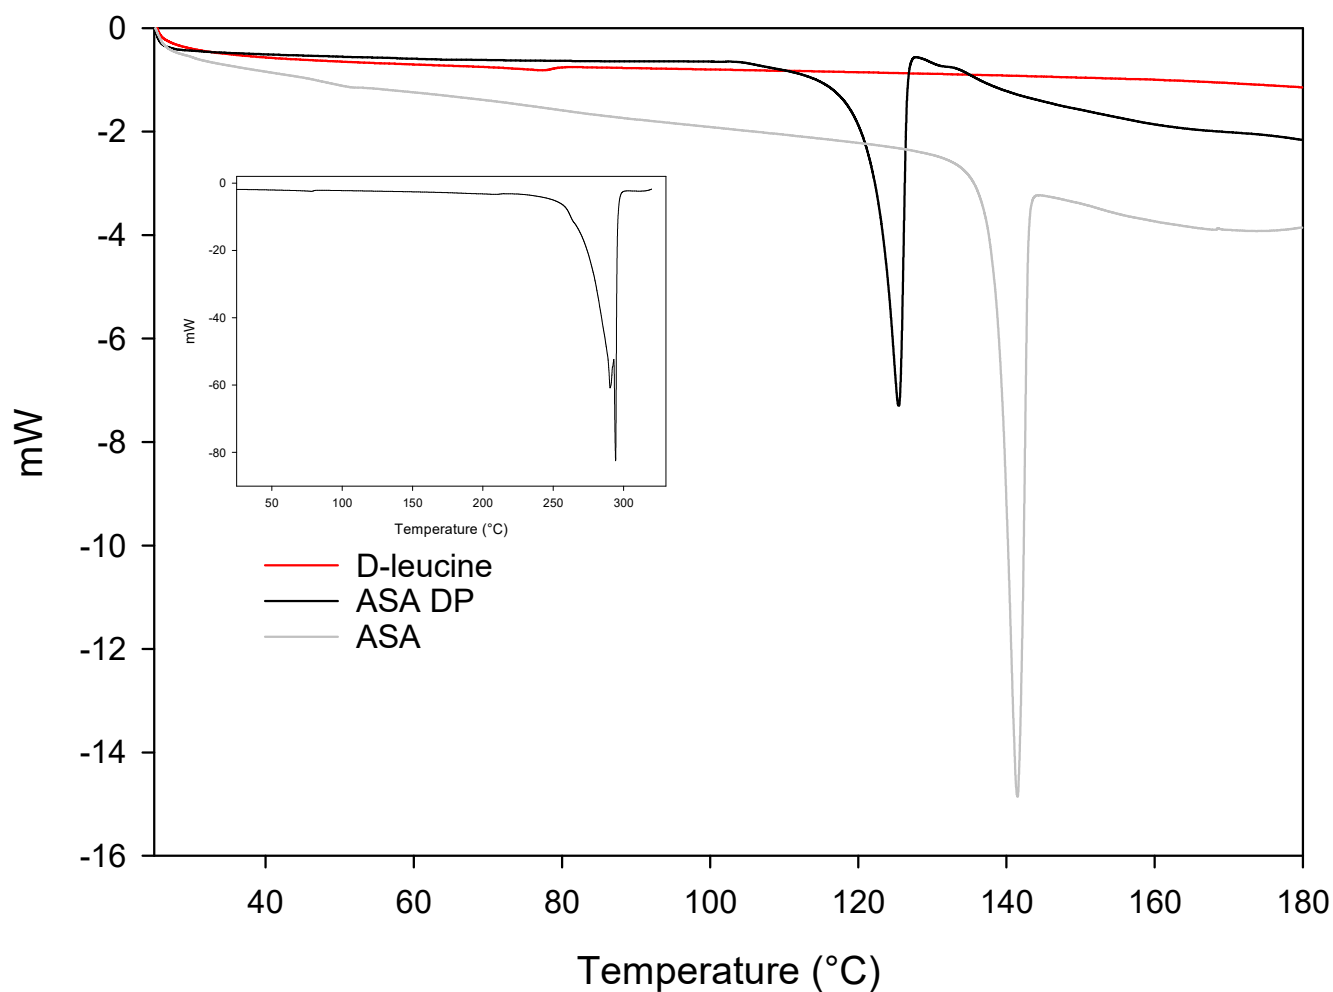

**Figure S3.** DSC analysis of the obtained ASA dry powder corresponding to the run# 7 of the experimental design (Table 2) (Endo down). Insert) Complete DSC profile of D-leucine showing melting and decomposition at 280-290 °C. ASA is present as a crystalline phase, note the significant downshift of the melting temperature, from 141 °C to 125 °C. This effect can be ascribed to phase mixing between ASA and D-leucine.
